# Supplementary material
Source: publisher figshare collection journal article supplement (https://future-science-group.figshare.com/ndownloader/files/28381818)
Supplement: Supplementary file 1 [file 28381818]

**Supplementary Information**

**Salvianolic Acid B non-covalently interacts with the disordered c-Myc: a computational and spectroscopic-based study.**

Ashutosh Singh1, Ankur Kumar1, Prateek Kumar1, Taniya Bhardwaj1, Rajanish Giri1, Neha Garg2*

1School of Basic Sciences, Indian Institute of Technology Mandi, VPO- Kamand, Mandi, 175005, Himachal Pradesh, India.

2Department of Medicinal Chemistry, Institute of Medical Sciences, Banaras Hindu University, Varanasi- 221005, Uttar Pradesh, India.

*Email: [nehagarg@bhu.ac.in](mailto:nehagarg@bhu.ac.in) (NG)


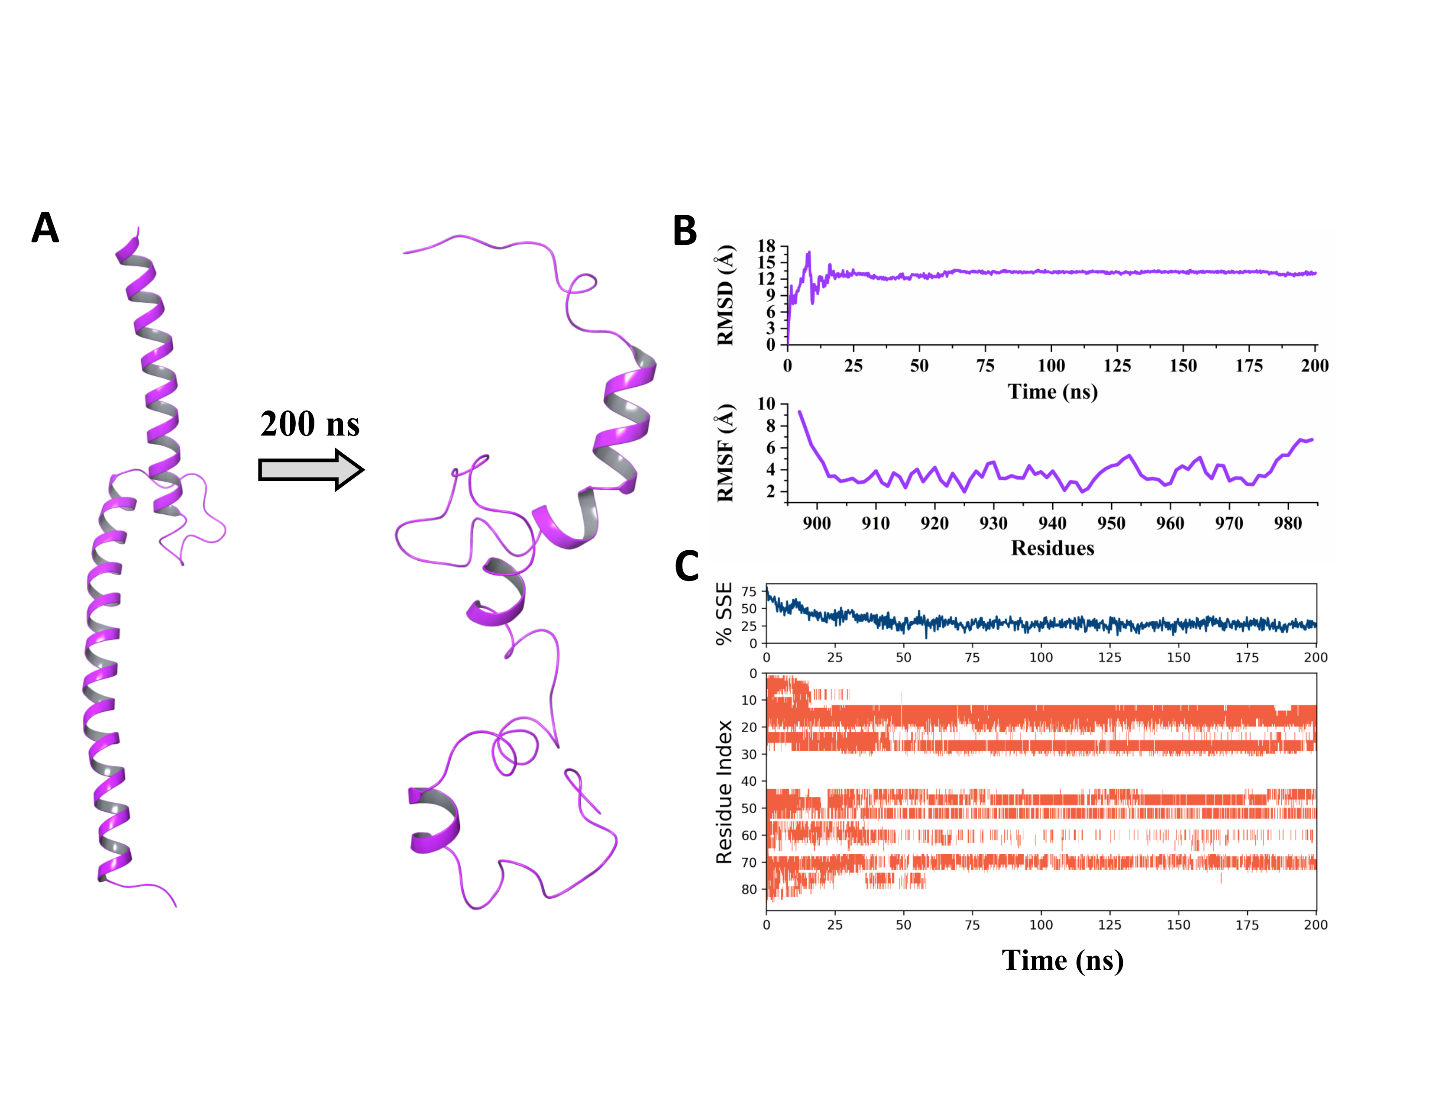


**Figure S1: Molecular dynamics simulation of Myc protein extracted from Myc/MAX complex (PDB Id- 1NKP). (A)** Before and after simulation structures of Myc. **(B)** Root mean square (Deviation; RMSD) and (Fluctuation; RMSF) analysis, and **(C)** Secondary structure element (SSE) analysis throughout the simulation period of 200 ns.


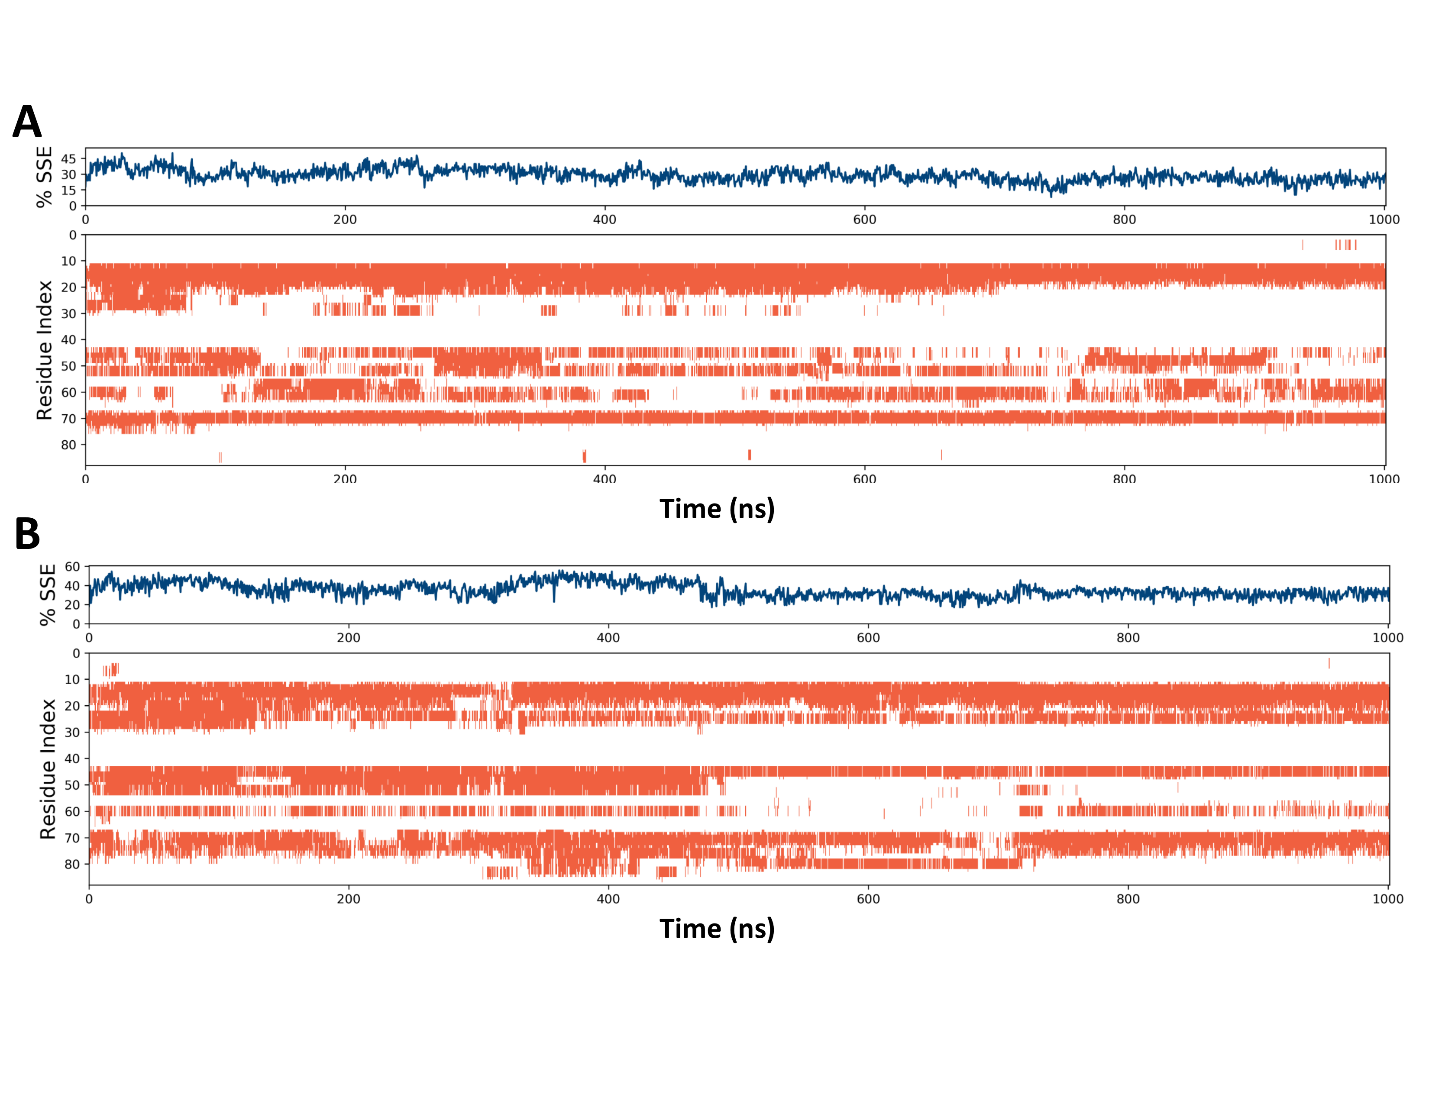


**Figure S2:** SSE analysis of unbound (29% SSE) **(A)** and Sal_Ac_B bound Myc200 (35% SSE)**(B)** during one microsecond simulation showed a gain in structural helicity after binding of compound, Sal_Ac_B.
